# Supplementary material for: Motor control of an insect leg during level and incline walking
Source: Oxford University Press journal article supplement (doi:10.1242/jeb.188748), 2019-04-01
Supplement: jeb188748supp.pdf [file jeb188748supp.pdf]

**Table S1. Kinematic parameters for level walking with and without the EMG backpack**

| Kinematic parameter | control   | EMG backpack    |
|---------------------|-----------|-----------------|
| Pro. swing (deg)    | -33.0±4.9 | -38.6±2.8 [-12] |
| Pro. stance (deg)   | -42.8±6.1 | -42.9±3.8 [<1]  |
| Sup. swing (deg)    | 1.8±5.3   | -0.2±5.1 [-8]   |
| Sup. stance (deg)   | -0.3±5.2  | -0.1±4.6 [1]    |
| Lev. swing (deg)    | 31.8±7.1  | 30.9±6.5 [-3]   |
| Lev. stance (deg)   | 27.1±2.8  | 23.6±3.7 [-11]  |
| Ext. swing (deg)    | 110.5±4.0 | 110.2±5.5 [<1]  |
| Ext. stance (deg)   | 88.2±4.7  | 86.8±3.5 [-2]   |

Values are means±s.d. of animal means (control, 5 animals, 10 steps per animal; EMG backpack, same animals, 18-33 steps per animal). Values in brackets indicate differences from level walking as a percentage of the range of the parameter (peak-to-peak amplitude of the parameter's mean time course) during the step cycle of control steps. Angles are net values averaged over each phase of the step cycle. Pro., protraction angle; Sup., supination angle; Lev., levation angle; Ext., extension angle. See Fig. 1B for angle conventions.

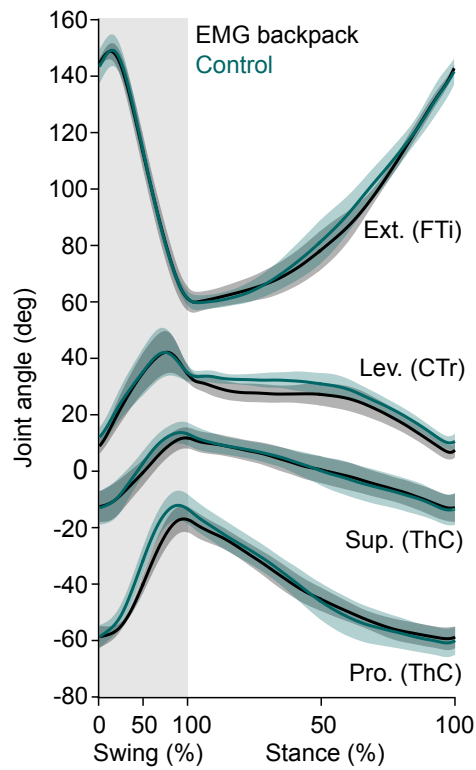

**Fig. S1. Effects of the EMG backpack on hind leg kinematics.** Joint angles of the hind leg during level walking normalized to swing and stance duration. Lines and error bands show means and 95% confidence intervals of animal means. Black lines show data with EMG backpack attached and electrodes implanted (5 animals, 18-33 steps per animal; same as black lines in Fig. 2H). Green lines show control data recorded from the same animals prior to backpack attachment and electrode implantation (5 animals, 10 steps per animal).
